# Supplementary material for: Single domain antibodies against enteric pathogen virulence factors are active as curli fiber fusions on probiotic E. coli Nissle 1917
Source: PubMed Central journal article supplement (PMC9477280; doi:10.1371/journal.ppat.1010713), 2022-09-15

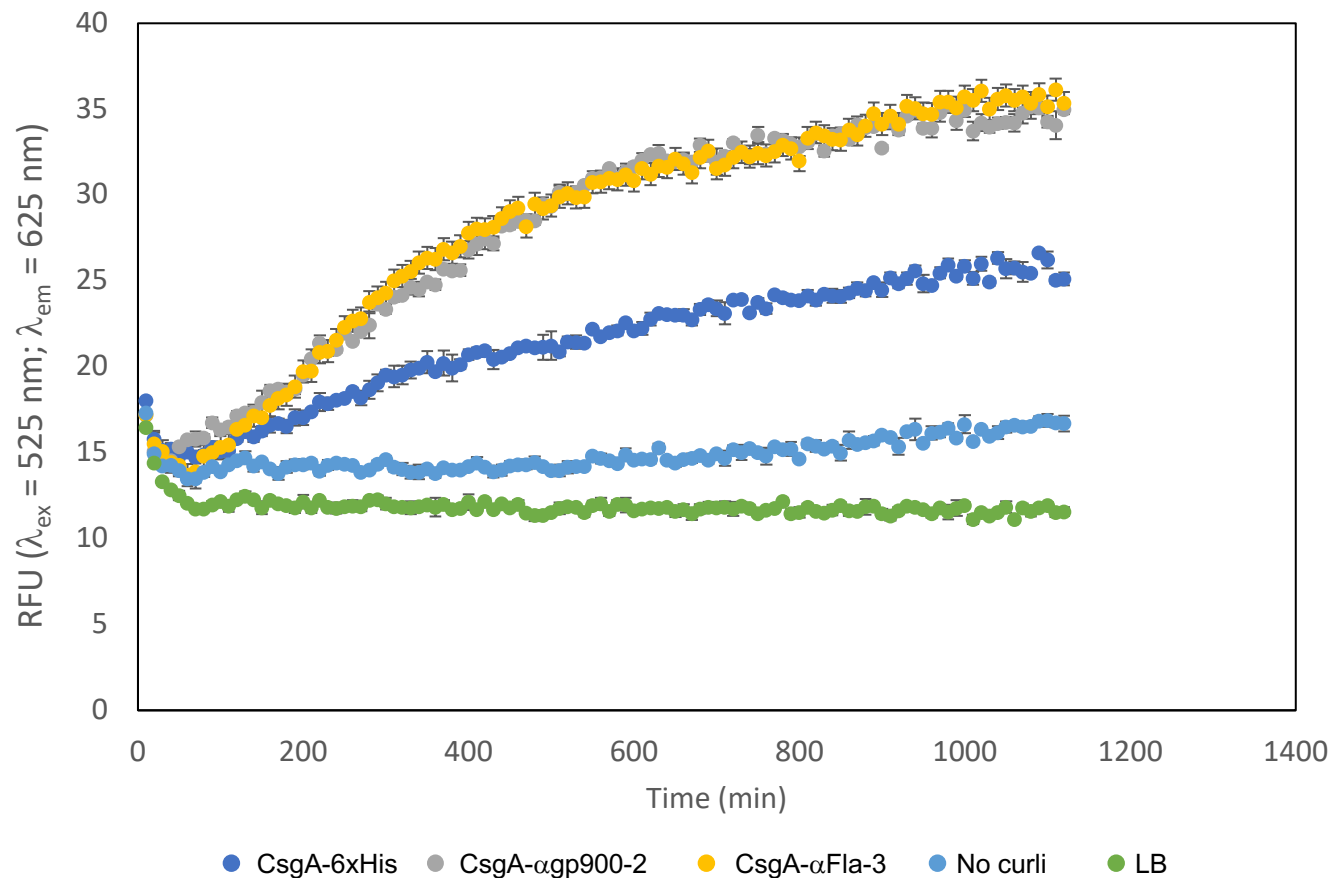

Supplement: ppat.1010713.s009.pdf [file ppat.1010713.s009.pdf]
