# Supplementary material for: Single domain antibodies against enteric pathogen virulence factors are active as curli fiber fusions on probiotic E. coli Nissle 1917
Source: PubMed Central journal article supplement (PMC9477280; doi:10.1371/journal.ppat.1010713), 2022-09-15

**(a)**

CsgA-6xHis

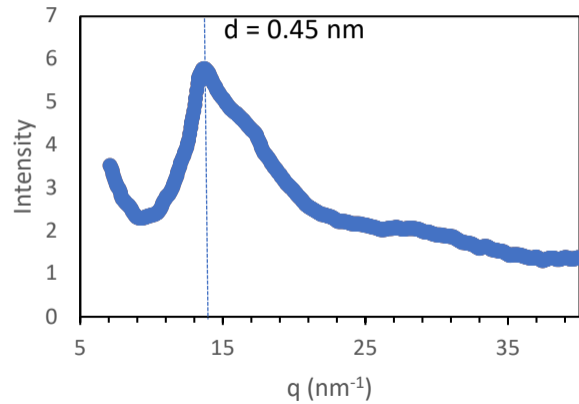**(b)**CsgA- $\alpha$ Fla-3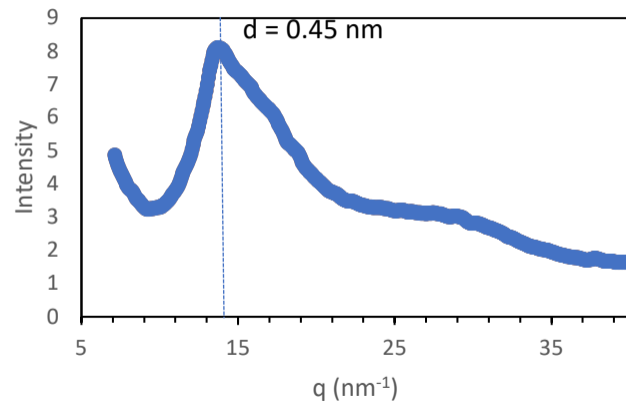**(c)**CsgA- $\alpha$ gp900-2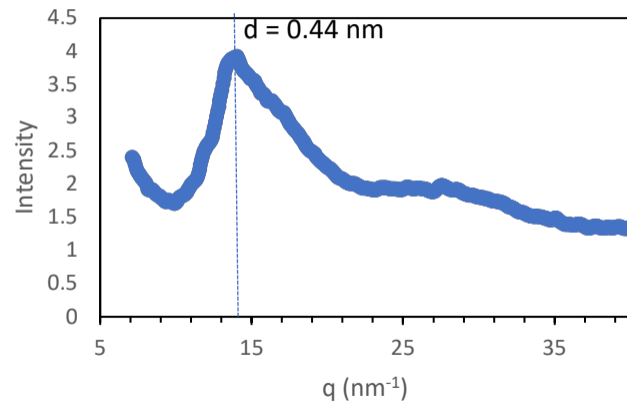

Supplement: ppat.1010713.s010.pdf [file ppat.1010713.s010.pdf]
